# Supplementary material for: The Impact of Ethologically Relevant Stressors on Adult Mammalian Neurogenesis
Source: PubMed Central journal article supplement (PMC6680763; doi:10.3390/brainsci9070158), 2019-07-04
Supplement: brainsci-09-00158-s001.pdf [file brainsci-09-00158-s001.pdf]

Table. The effects of ethologically relevant stressors on the different stages of adult neurogenesis in several mammalian species

| Stressor                        | Cell Proliferation         |                        | Cell Survival          |                      | Cell Differentiation |                        | Reference            |
|---------------------------------|----------------------------|------------------------|------------------------|----------------------|----------------------|------------------------|----------------------|
|                                 | Brain region               | Species                | Brain region           | Species              | Brain region         | Species                |                      |
| <b>Conspecific</b>              |                            |                        |                        |                      |                      |                        |                      |
| Separation from peers           |                            |                        |                        |                      |                      |                        |                      |
| Acute                           | --                         |                        | --                     |                      | --                   |                        |                      |
| Subchronic                      | ↑ DG                       | ♂ California mouse     | 0 DG                   | Wistar rat           | 0 DG                 | California mouse       | [70, 71, 72]         |
|                                 | 0 DG                       | ♀ California mouse     |                        |                      | 0 DG, SVZ            | ♀ prairie vole         |                      |
|                                 | 0 AMY, Cing, CdPu, DG, HYP | ♀ prairie vole         |                        |                      |                      |                        |                      |
|                                 | ↑ SVZ                      | ♀ prairie vole         |                        |                      |                      |                        |                      |
| Chronic                         | 0 AMY, VMH                 | ♀ prairie vole         | 0 DG                   | ♂ California mouse   | ↓ AMY                | ♀ prairie vole         | [70, 71, 72, 73, 74] |
|                                 | ↓ DG, MPOA                 | ♀ prairie vole         | ↓ DG                   | ♀ California mouse   | ↔ DG                 | ♀ prairie vole         |                      |
|                                 |                            |                        | ↔ AMY, DG              | ♀ prairie vole       | 0 MOB                | ♀ prairie vole         |                      |
|                                 |                            |                        | 0 Cing, CdPu, HYP, MOB | ♀ prairie vole       | 0 DG                 | ♂ Sprague-Dawley rat   |                      |
|                                 |                            |                        | ↔ DG                   | ♂ Sprague-Dawley rat |                      |                        |                      |
|                                 |                            |                        | 0 DG                   | ♂ Wistar rat         |                      |                        |                      |
|                                 |                            | ↓ DG                   | ♀ Wistar rat           |                      |                      |                        |                      |
| Separation from offspring       |                            |                        |                        |                      |                      |                        |                      |
| Acute                           | --                         |                        | --                     |                      | --                   |                        |                      |
| Intermittent                    | ↓ DG                       | ♀ rat                  | --                     |                      | --                   |                        | [82]                 |
| Confrontation via dominance     |                            |                        |                        |                      |                      |                        |                      |
| Acute                           | --                         |                        | --                     |                      | --                   |                        |                      |
| Subchronic                      | 0 DG                       | ♂ Sprague-Dawley rat   | ↑ DG                   | ♂ baboon             | --                   |                        | [61, 91]             |
| Chronic                         | ↓ DG                       | ♀ Mole-rat             | ↑ DG                   | ♂ Sprague-Dawley rat | 0 DG                 | ♂ Sprague-Dawley rat   | [61, 90, 92]         |
|                                 | ↑ DG                       | ♂ Sprague-Dawley rat   |                        |                      |                      |                        |                      |
| Confrontation via social defeat |                            |                        |                        |                      |                      |                        |                      |
| Acute                           | 0 DG                       | ♂ mouse, rat           | ↓ DG                   | ♂ rat                | 0 DG                 | ♂ marmoset, tree shrew | [51, 100, 101, 102]  |
|                                 | ↓ DG                       | ♂ marmoset, tree shrew |                        |                      | ↓ DG                 | ♂ rat                  |                      |
| Subchronic                      | 0 AMY                      | ♂ mouse                | ↓ DG                   | ♂ mouse, rat         | ↓ DG                 | ♂ mouse                | [103, 104, 105, 106] |
|                                 | ↓ DG                       | ♂ mouse, rat           |                        |                      | 0 DG                 | ♂ rat                  |                      |

|                |            |                   |            |       |           |       |                           |
|----------------|------------|-------------------|------------|-------|-----------|-------|---------------------------|
| Chronic        | ↓ DG       | ♂ rat, tree shrew | ↓ DG       | ♂ rat | 0 DG, PFC | ♂ rat | [107, 108, 109, 110, 111] |
|                | ↓ PFC      | ♂ rat             | ↓ PFC      | ♂ rat |           |       |                           |
|                | 0 SVZ, Mot | ♂ rat             | 0 SVZ, Mot | ♂ rat |           |       |                           |
| Nonconspecific |            |                   |            |       |           |       |                           |
| Acute (short)  | 0 DG       | ♂ rat             | ↔ DG       | ♂ rat | 0 DG      | ♂ rat | [115, 116, 117, 118]      |
| Acute (long)   | ↓ DG       | ♂ rat             |            |       |           |       |                           |
|                | 0 DG       | ♀ rat             |            |       |           |       |                           |

---

acute = one exposure not exceeding 24 hours, subchronic = exposure ranging from 2-10 days, chronic = exposure lasting longer than 10 days

AMY: amygdala; Cing.: cingulate cortex; CdPu: caudate putamen; DG: dentate gyrus of the hippocampus; HYP: hypothalamus; MOB: main olfactory bulb; MPOA: medial preoptic area

Mot: primary motor cortex; SVZ: subventricular zone; VMH: ventromedial hypothalamus

↑: increase; ↓: decrease; 0: no change; ↔: mixed findings; -: no data
